# Supplementary material for: Rapid neurostimulation at the micron scale with an optically controlled thermal-capture technique
Source: Royal Society of Chemistry journal article supplement (doi:10.1039/d4bm01114g), 2024-11-05
Supplement: d4bm01114g1.pdf [file d4bm01114g1.pdf]

## Supplementary Information

### 1. Patch-electrode voltage under local heating protocols.

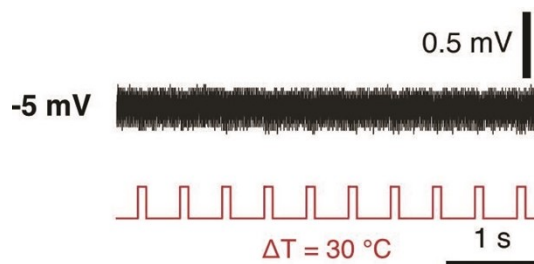

**Fig. S1.** Changes in the glass electrode voltage under a 2 Hz train of 100 ms heat pulses ( $\Delta T_{\text{heat}} = 30\text{ }^{\circ}\text{C}$ ). The distance between electrode and DHT was  $\sim 1\text{ }\mu\text{m}$ .

### 2. Influence of 640 nm laser irradiation on electrophysiological properties of cells.

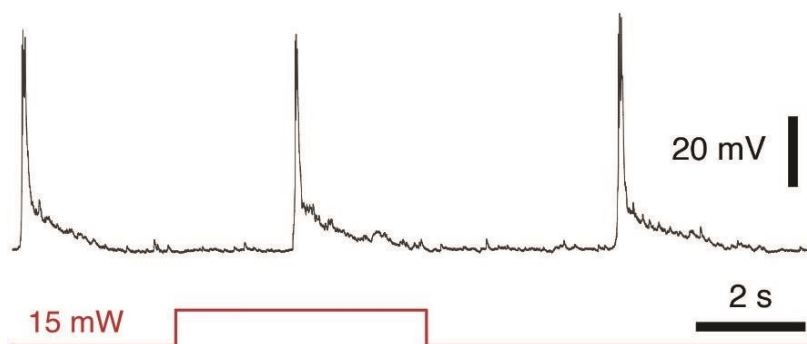

**Fig. S2.** Application of 15 mW 5s laser pulse alone in the absence of DHT at focal point did not produce any electrophysiological response in neurons.

### 3. Resistance of neurons to non-physiological temperature at microscale.

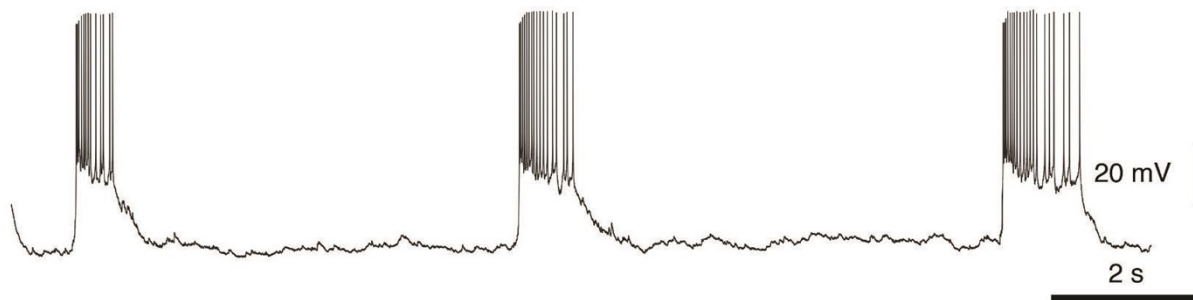

**Fig. S3.** Membrane potential and burst activity in a current-clamped neuron 30 min after cessation of the sequence of ten heat pulses with duration 1 ms and  $T_{\text{heat}} = 80\text{ }^{\circ}\text{C}$ .

#### 4. Optical images of neurons after different treatments.

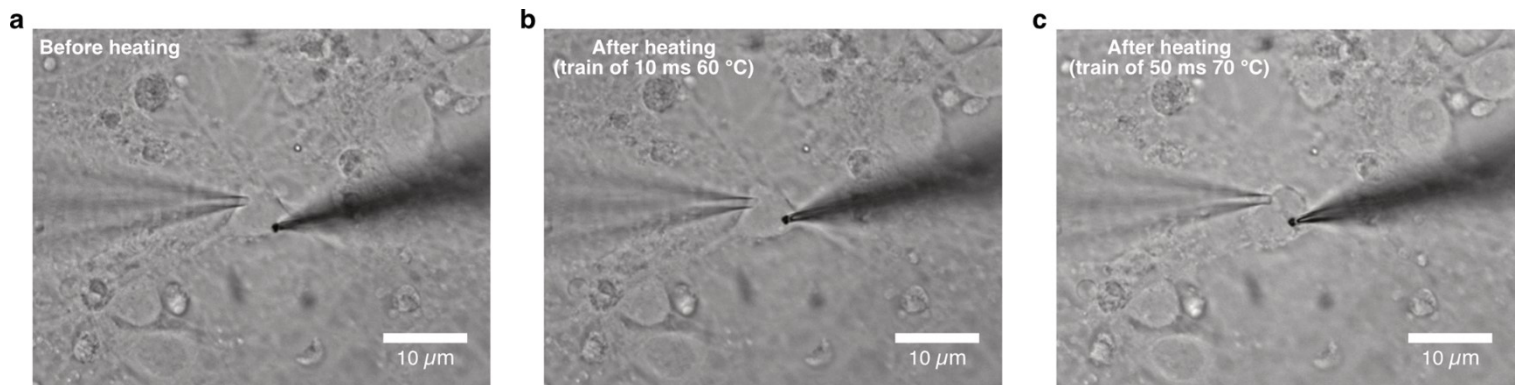

**Fig. S4.** DGC-optical images of neurons after different heat protocols: (a) neuron without thermal exposure, (b) neuron 20 minutes after several trains of short (<10 ms) 60 °C pulses and (c) neuron 5 minutes after a sequence of 50 ms 70 °C pulses.

#### 5. Thermal exposure of neurons to high temperatures with DHT1.4.

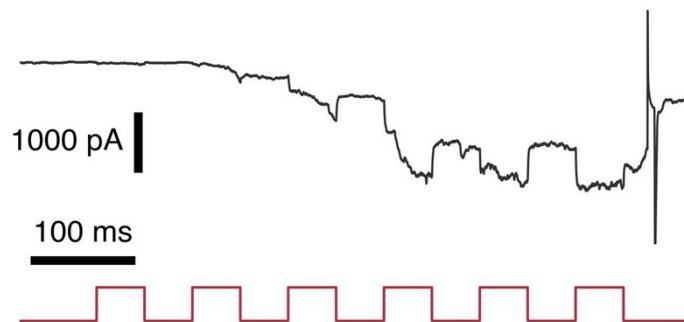

**Fig. S5.** TCM-induced currents recorded in voltage-clamped neurons evoked by 10 Hz train of 50 ms 70 °C heat pulses.

#### 6. Depolarization currents in neurons with short thermal pulses.

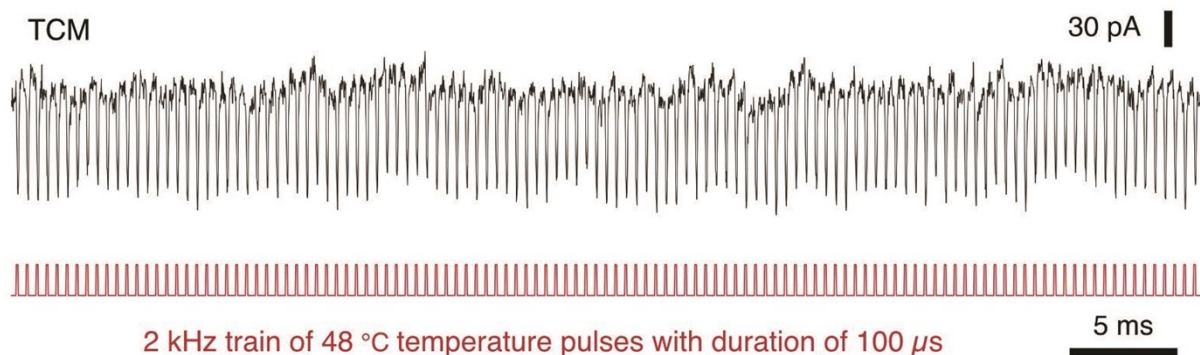

**Fig. S6.** TCM-induced depolarization currents in cultured neurons at a 2 kHz train of 100  $\mu$ s heat pulses ( $T_{\text{heat}} = 48$  °C) produced by DHT1.4.

### 7. Thermal excitability of neurons with DHT0.5.

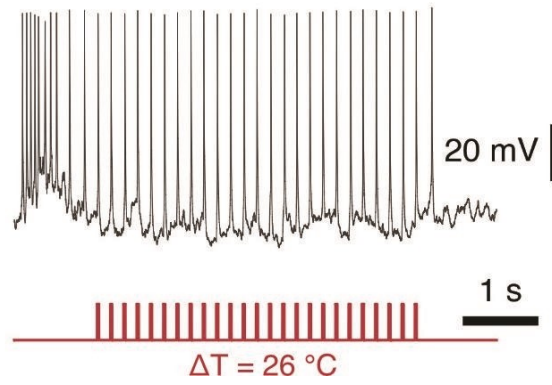

**Fig. S7.** TCM-induced generation of action potentials in cultured neurons at a 5 Hz train of 25 ms heat pulses ( $\Delta T_{\text{heat}} = 26\text{ }^{\circ}\text{C}$ ) produced by DHT of 500 nm in size.
